# Supplementary material for: Theoretical insights into the separation of Am(iii)/Eu(iii): designing ligands based on a preorganization strategy
Source: Royal Society of Chemistry journal article supplement (doi:10.1039/d2dt02474h), 2022-01-01
Supplement: d2dt02474h1.pdf [file d2dt02474h1.pdf]

# Electronic Supplementary Information for

## Theoretical Insights into the Separation of Am(III)/Eu(III): Designing Ligands Based on a Preorganization Strategy

Xia-Ping Lei<sup>a,b</sup>, Qun-Yan Wu<sup>\*,a</sup>, Cong-Zhi Wang<sup>a</sup>, Jian-Hui Lan<sup>a</sup>, Zhi-Fang Chai<sup>a</sup>,  
Chang-Ming Nie<sup>b</sup> and Wei-Qun Shi<sup>\*,a</sup>

<sup>a</sup>Laboratory of Nuclear Energy Chemistry, Institute of High Energy Physics, Chinese  
Academy of Sciences, Beijing, 100049, China

<sup>b</sup>School of Chemistry and Chemical Engineering, University of South China,  
Hengyang, 421001, China

### Corresponding Authors

\*E-mail: wuqy@ihep.ac.cn. Tel: 86-10-88235242

\*E-mail: shiwq@ihep.ac.cn. Tel: 86-10-88233968

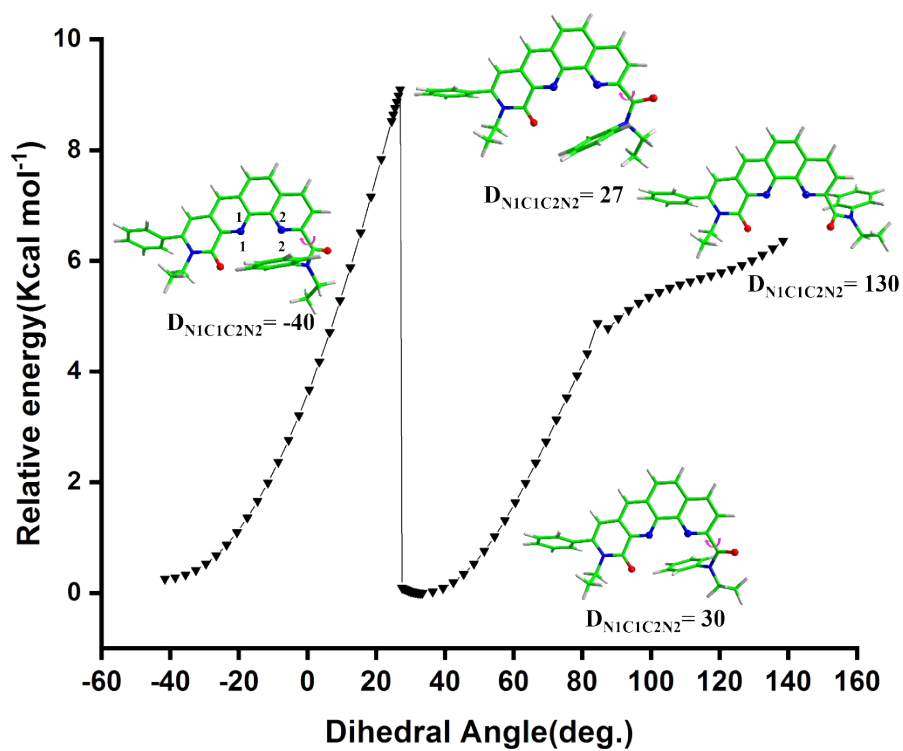

**Fig. S1** PES scans of  $D_{N1C1C2N2}$  dihedral angle for  $L^1$ .

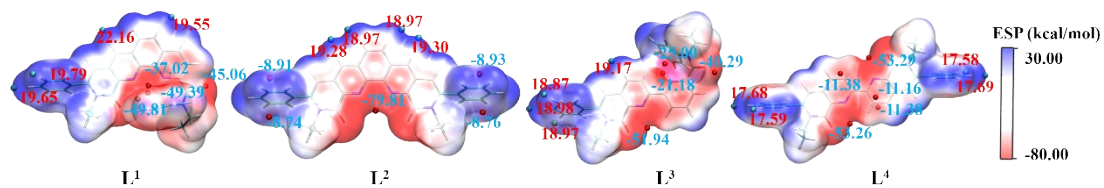

**Fig. S2** ESP of  $L^1$ - $L^4$ . The values (kcal/mol) of the negative and positive ESP are presented as blue and red spheres, respectively.

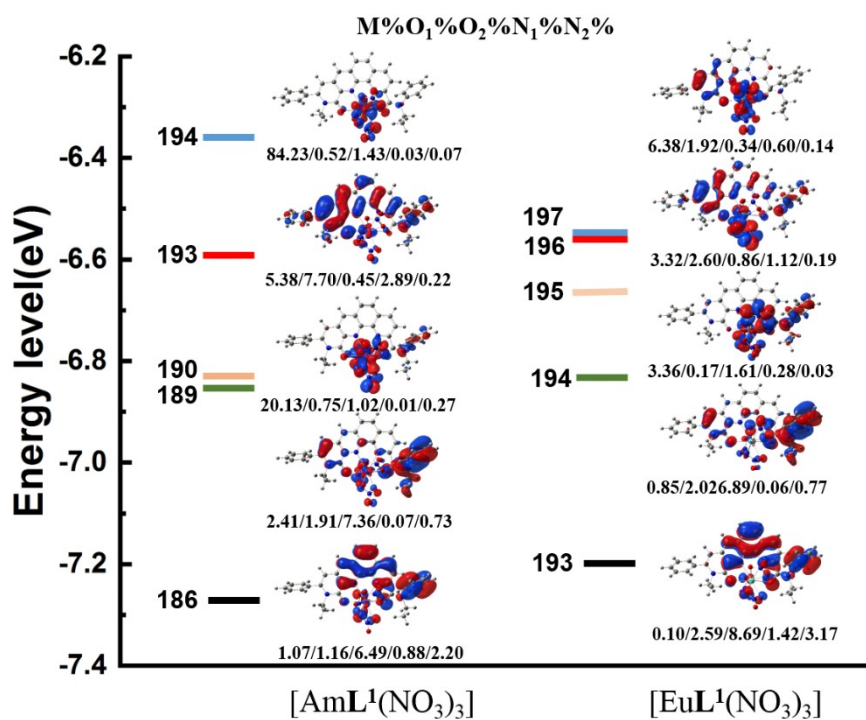

**Fig. S3** Energy level (eV) and diagrams of the  $\alpha$ -spin MOs of  $ML^1(NO_3)_3$  complexes at the B3LYP/6-31G(d)/RECP level of theory in the gas phase (the isosurface value is set as 0.02 au).

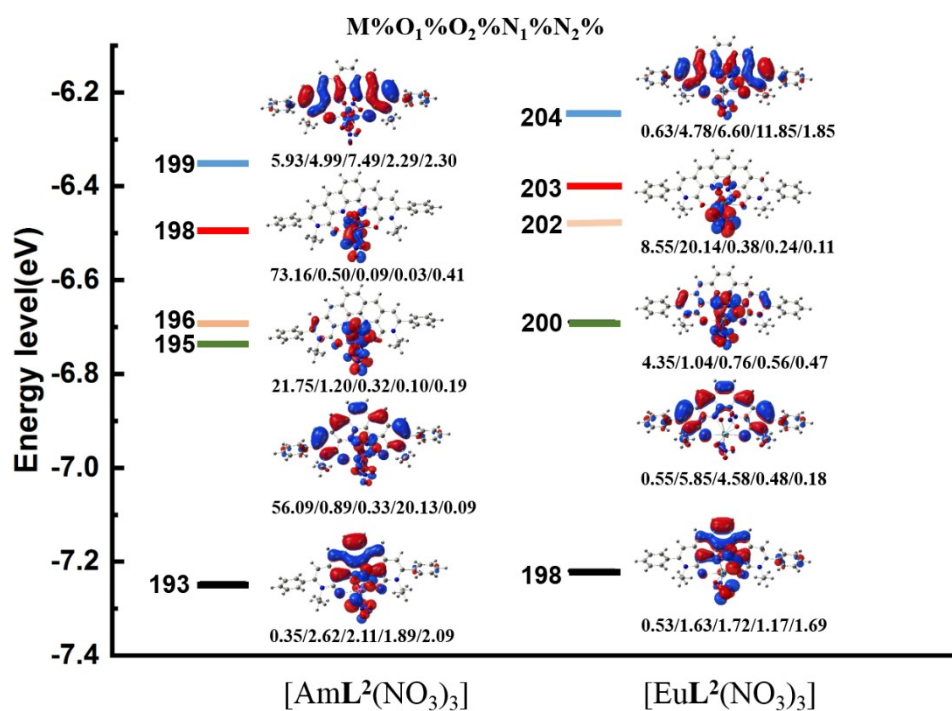

**Fig. S4** Energy level (eV) and diagrams of the  $\alpha$ -spin MOs of  $ML^2(NO_3)_3$  complexes at the B3LYP/6-31G(d)/RECP level of theory in the gas phase. (the isosurface value is set as 0.02 a.u.)

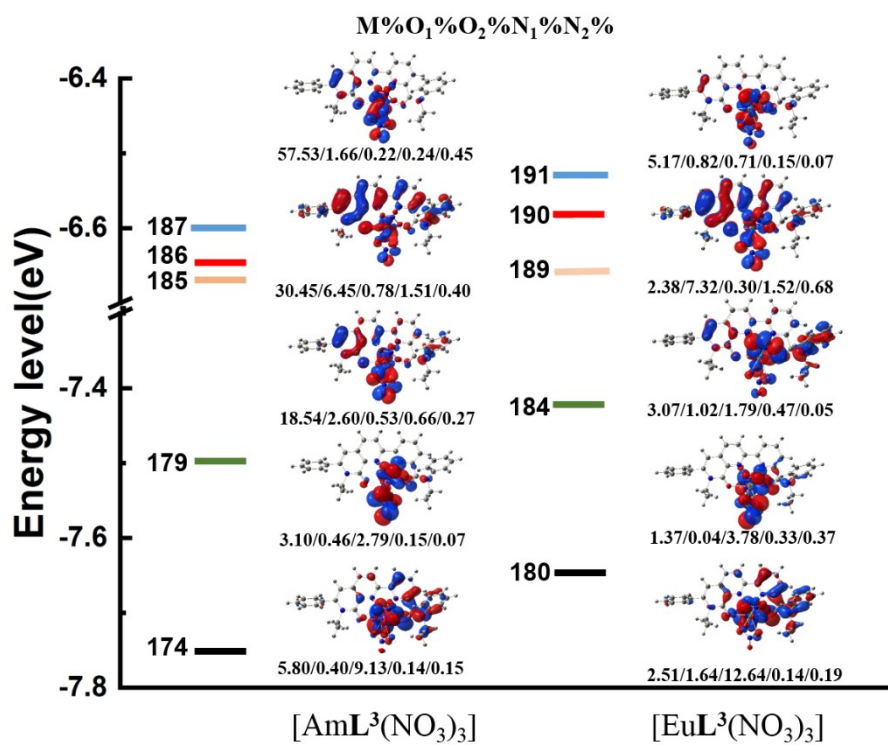

**Fig. S5** Energy level (eV) and diagrams of the  $\alpha$ -spin MOs of  $ML^3(NO_3)_3$  complexes at the B3LYP/6-31G(d)/RECP level of theory in the gas phase. (the isosurface value is set as 0.02 a.u.)

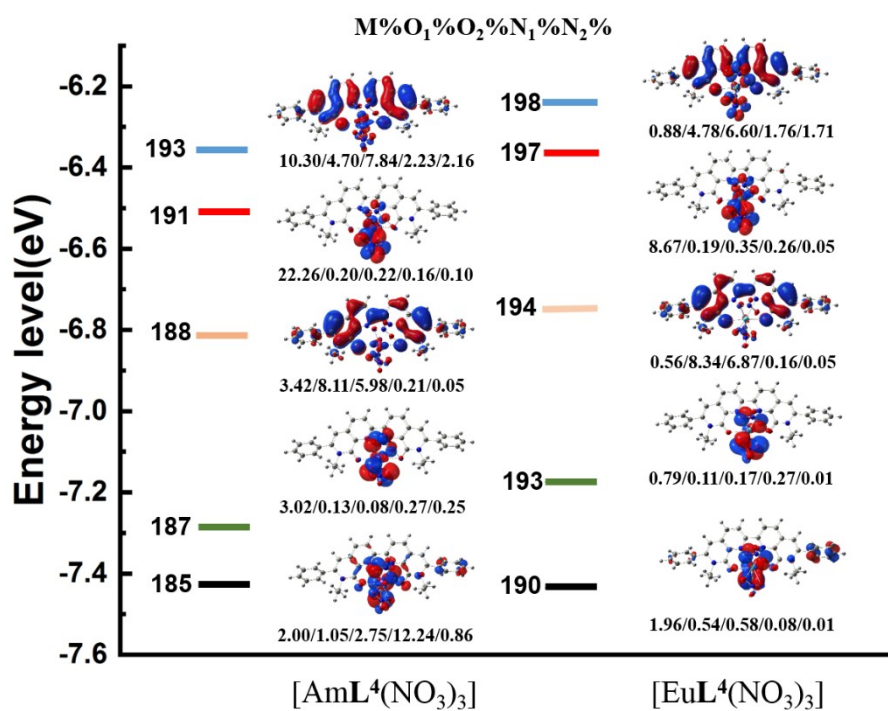

**Fig. S6** Energy level (eV) and diagrams of the  $\alpha$ -spin MOs of  $ML^4(NO_3)_3$  complexes at the B3LYP/6-31G(d)/RECP level of theory in the gas phase. (the isosurface value is set as 0.02 a.u.)

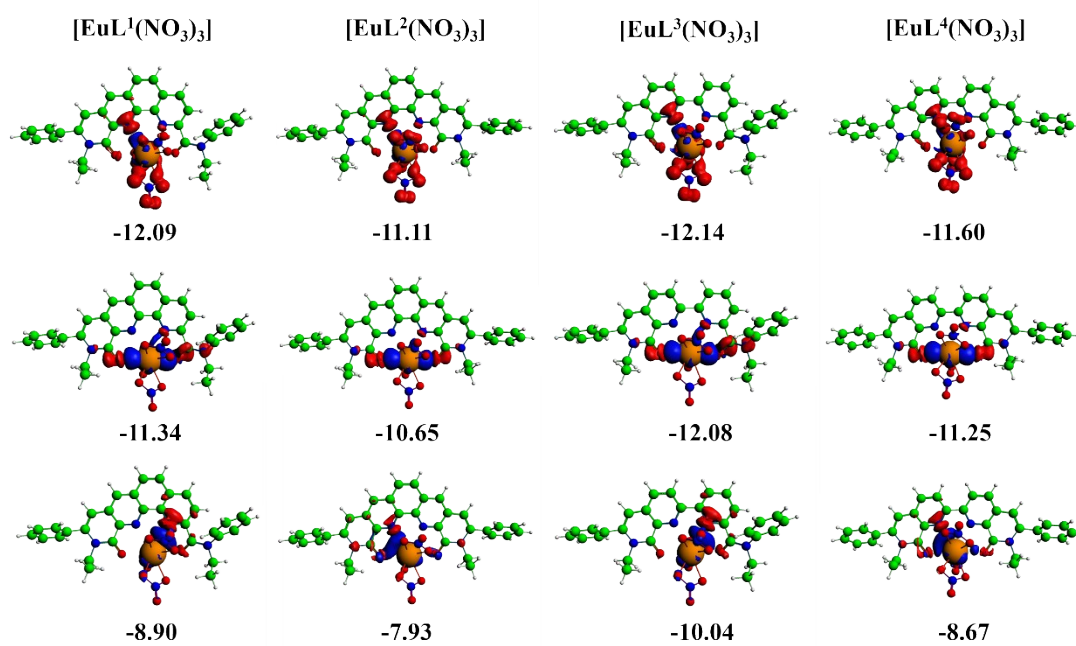

**Fig. S7** Natural orbitals for the chemical valence (NOCV) with the larger contribution to the orbital interaction energy for the [EuL(NO<sub>3</sub>)<sub>3</sub>] complexes. The corresponding orbital interaction energy (kcal/mol) contribution for each NOCV pair is also presented.

**Table S1.** The relative electronic energies (kcal/mol) to each ground state for the  $[\text{AmL}^2(\text{NO}_3)_3]$  and  $[\text{EuL}^2(\text{NO}_3)_3]$  complexes at the B3LYP/6-31G(d)/RECP level of theory.

| Spin state                      | singlet | triplet | quintet | septet |
|---------------------------------|---------|---------|---------|--------|
| $[\text{AmL}^2(\text{NO}_3)_3]$ | 100.57  | 64.09   | 40.07   | 0.00   |
| $[\text{EuL}^2(\text{NO}_3)_3]$ | 145.33  | 90.60   | 57.20   | 0.00   |

**Table S2.** Properties of the  $\text{L}^1$ - $\text{L}^4$  Ligands

|              | IP    | EA     | $\eta$ |
|--------------|-------|--------|--------|
| $\text{L}^1$ | 17.29 | -9.72  | 13.50  |
| $\text{L}^2$ | 17.16 | -10.16 | 13.66  |
| $\text{L}^3$ | 16.93 | -9.70  | 13.31  |
| $\text{L}^4$ | 16.73 | -9.74  | 13.23  |

**Table S3.** WBIs of the M–N and M–O Bonds in the  $\text{ML}(\text{NO}_3)_3$  Complexes at the B3LYP/6-31G(d)/RECP Level of Theory in the Gas Phas

| complexes                               | M-N <sub>1</sub> | M-N <sub>2</sub> | M-O <sub>1</sub> | M-O <sub>2</sub> |
|-----------------------------------------|------------------|------------------|------------------|------------------|
| $[\text{M}(\text{L}^1)(\text{NO}_3)_3]$ | 0.206/0.163      | 0.189/0.164      | 0.238/0.210      | 0.223/0.203      |
| $[\text{M}(\text{L}^2)(\text{NO}_3)_3]$ | 0.199/0.155      | 0.192/0.159      | 0.229/0.202      | 0.221/0.199      |
| $[\text{M}(\text{L}^3)(\text{NO}_3)_3]$ | 0.200/0.160      | 0.188/0.164      | 0.228/0.219      | 0.241/0.211      |
| $[\text{M}(\text{L}^4)(\text{NO}_3)_3]$ | 0.201/0.154      | 0.194/0.158      | 0.236/0.212      | 0.227/0.208      |



**Table S4.** Second-order perturbative estimates (E(2), kcal/mol) of donor-acceptor interactions between O/N-ligands and Am(III)/Eu(III) in the [ML(NO<sub>3</sub>)<sub>3</sub>] complexes.

| Complexes                                           | donor→acceptor     | Character of empty metal orbita      | E(2)  |
|-----------------------------------------------------|--------------------|--------------------------------------|-------|
| [AmL <sup>1</sup> (NO <sub>3</sub> ) <sub>3</sub> ] | N <sub>1</sub> →Am | p(0.03%),d(99.50%),f(0.46%)          | 7.20  |
|                                                     | N <sub>2</sub> →Am | s(0.11%),p(0.13%),d(99.27%),f(0.49%) | 5.84  |
|                                                     | O <sub>1</sub> →Am | s(1.33%),p(0.09%),d(98.00%),f(0.58%) | 10.16 |
|                                                     | O <sub>2</sub> →Am | s(0.11%),p(0.13%),d(99.27%),f(0.49%) | 8.72  |
| [EuL <sup>1</sup> (NO <sub>3</sub> ) <sub>3</sub> ] | N <sub>1</sub> →Eu | s(1.08%),p(0.01%),d(98.47%),f(0.40%) | 14.41 |
|                                                     | N <sub>2</sub> →Eu | s(0.04%),p(0.12%),d(99.36%),f(0.46%) | 6.72  |
|                                                     | O <sub>1</sub> →Eu | s(4.63%),p(0.03%),d(94.90%),f(0.43%) | 10.06 |
|                                                     | O <sub>2</sub> →Eu | s(0.04%),p(0.12%),d(99.36%),f(0.46%) | 7.47  |
| [AmL <sup>2</sup> (NO <sub>3</sub> ) <sub>3</sub> ] | N <sub>1</sub> →Am | s(0.01%),p(0.09%),d(99.39%),f(0.52%) | 8.70  |
|                                                     | N <sub>2</sub> →Am | s(0.08%),p(0.12%),d(99.05%),f(0.75%) | 6.22  |
|                                                     | O <sub>1</sub> →Am | s(0.96%),p(0.05%),d(98.38%),f(0.61%) | 6.26  |
|                                                     | O <sub>2</sub> →Am | s(0.08%),p(0.12%),d(99.05%),f(0.75%) | 7.41  |
| [EuL <sup>2</sup> (NO <sub>3</sub> ) <sub>3</sub> ] | N <sub>1</sub> →Eu | s(0.61%),p(0.01%),d(98.98%),f(0.37%) | 13.31 |
|                                                     | N <sub>2</sub> →Eu | s(0.03%),p(0.09%),d(99.17%),f(0.70%) | 6.60  |
|                                                     | O <sub>1</sub> →Eu | s(0.42%),p(0.05%),d(99.27%),f(0.24%) | 8.01  |
|                                                     | O <sub>2</sub> →Eu | s(0.03%),p(0.09%),d(99.17%),f(0.70%) | 6.22  |
| [AmL <sup>3</sup> (NO <sub>3</sub> ) <sub>3</sub> ] | N <sub>1</sub> →Am | p(0.04%),d(99.48%),f(0.48%)          | 6.88  |
|                                                     | N <sub>2</sub> →Am | s(0.14%),p(0.14%),d(99.17%),f(0.54%) | 6.11  |
|                                                     | O <sub>1</sub> →Am | s(1.66%),p(0.08%),d(97.65%),f(0.61%) | 9.84  |
|                                                     | O <sub>2</sub> →Am | s(0.14%),p(0.14%),d(99.17%),f(0.54%) | 9.60  |
| [EuL <sup>3</sup> (NO <sub>3</sub> ) <sub>3</sub> ] | N <sub>1</sub> →Eu | s(1.81%),p(0.02%),d(97.72%),f(0.42%) | 13.21 |
|                                                     | N <sub>2</sub> →Eu | s(0.04%),p(0.12%),d(99.33%),f(0.50%) | 7.35  |
|                                                     | O <sub>1</sub> →Eu | s(5.44%),p(0.22%),d(94.09%),f(0.43%) | 9.48  |
|                                                     | O <sub>2</sub> →Eu | s(0.04%),p(0.12%),d(99.33%),f(0.50%) | 8.11  |
| [AmL <sup>4</sup> (NO <sub>3</sub> ) <sub>3</sub> ] | N <sub>1</sub> →Am | s(0.01%),p(0.08%),d(99.41%),f(0.50%) | 9.40  |
|                                                     | N <sub>2</sub> →Am | s(0.10%),p(0.10%),d(99.12%),f(0.68%) | 5.77  |
|                                                     | O <sub>1</sub> →Am | s(1.26%),p(0.05%),d(98.05%),f(0.64%) | 7.69  |
|                                                     | O <sub>2</sub> →Am | s(0.10%),p(0.10%),d(99.12%),f(0.68%) | 8.59  |
| [EuL <sup>4</sup> (NO <sub>3</sub> ) <sub>3</sub> ] | N <sub>1</sub> →Eu | s(0.53%),p(0.01%),d(99.04%),f(0.39%) | 12.90 |
|                                                     | N <sub>2</sub> →Eu | s(0.02%),p(0.07%),d(99.22%),f(0.67%) | 6.70  |
|                                                     | O <sub>1</sub> →Eu | s(0.34%),p(0.04%),d(99.38%),f(0.23%) | 7.91  |
|                                                     | O <sub>2</sub> →Eu | s(0.02%),p(0.07%),d(99.22%),f(0.67%) | 7.18  |

**Table S5.** Total bonding energy (kcal/mol), Pauli, electrostatic and orbital

**interactions obtained from energy decomposition analysis at the BP86/TZ2P level of theory.**

| complexes                                             | $\Delta E_{\text{int}}$ | $\Delta E_{\text{Pauli}}$ | $\Delta E_{\text{orb}}$ | $\Delta E_{\text{elstat}}$ |
|-------------------------------------------------------|-------------------------|---------------------------|-------------------------|----------------------------|
| [Am(L <sup>1</sup> )(NO <sub>3</sub> ) <sub>3</sub> ] | -89.10                  | 109.04                    | -80.20                  | -117.94                    |
| [Am(L <sup>2</sup> )(NO <sub>3</sub> ) <sub>3</sub> ] | -86.14                  | 99.39                     | -74.45                  | -111.08                    |
| [Am(L <sup>3</sup> )(NO <sub>3</sub> ) <sub>3</sub> ] | -89.34                  | 114.82                    | -82.43                  | -114.82                    |
| [Am(L <sup>4</sup> )(NO <sub>3</sub> ) <sub>3</sub> ] | -87.36                  | 107.06                    | -77.77                  | -116.65                    |
| [Eu(L <sup>1</sup> )(NO <sub>3</sub> ) <sub>3</sub> ] | -91.08                  | 94.68                     | -78.96                  | -106.80                    |
| [Eu(L <sup>2</sup> )(NO <sub>3</sub> ) <sub>3</sub> ] | -87.84                  | 84.49                     | -72.81                  | -99.51                     |
| [Eu(L <sup>3</sup> )(NO <sub>3</sub> ) <sub>3</sub> ] | -91.66                  | 100.65                    | -81.69                  | -110.62                    |
| [Eu(L <sup>4</sup> )(NO <sub>3</sub> ) <sub>3</sub> ] | -89.20                  | 92.12                     | -76.29                  | -105.03                    |

**Table S6. Changes of the Energy ( $\Delta E$ , kcal/mol) for the Reactions  $[\text{M}(\text{NO}_3)(\text{H}_2\text{O})_8]^{2+} + \text{L}^3 + 2\text{NO}_3^- = [\text{ML}^3(\text{NO}_3)_3] + 8\text{H}_2\text{O}$  (M = Am and Eu) and the difference ( $\Delta\Delta E$ ) of between  $\Delta E_{\text{Am}}$  and  $\Delta E_{\text{Eu}}$  in the Cyclohexanone Solution at the B3LYP/TZP/SO and B3LYP/TZP/SR level of theory, respectively.**

| Reaction                                                                                                                                  | $\Delta E_{\text{SO}}$ | $\Delta\Delta E_{\text{SO}}$ | $\Delta E_{\text{SR}}$ | $\Delta\Delta E_{\text{SR}}$ |
|-------------------------------------------------------------------------------------------------------------------------------------------|------------------------|------------------------------|------------------------|------------------------------|
| $[\text{Am}(\text{NO}_3)(\text{H}_2\text{O})_8]^{2+} + \text{L}^3 + 2\text{NO}_3^- = [\text{AmL}^3(\text{NO}_3)_3] + 8\text{H}_2\text{O}$ | -0.93                  | -68.52                       | -37.42                 | -7.46                        |
| $[\text{Eu}(\text{NO}_3)(\text{H}_2\text{O})_8]^{2+} + \text{L}^3 + 2\text{NO}_3^- = [\text{EuL}^3(\text{NO}_3)_3] + 8\text{H}_2\text{O}$ | 67.59                  |                              | -29.96                 |                              |

## Cartesian coordinates

**L<sup>1</sup>**

| Atoms | X           | Y           | Z           |
|-------|-------------|-------------|-------------|
| O     | 2.07237700  | 14.64517500 | 2.57592300  |
| O     | 7.56098400  | 11.62064200 | -1.17242700 |
| N     | 2.51237400  | 11.96471900 | 2.05911200  |
| N     | 4.46456600  | 11.22023000 | 0.26561900  |
| N     | 0.51664300  | 14.16136800 | 4.18242700  |
| C     | 1.44683000  | 13.78751100 | 3.18902800  |
| C     | 1.58419100  | 12.32647600 | 2.93924900  |
| C     | 0.72672900  | 11.40748300 | 3.61003500  |
| N     | 5.89408300  | 13.16185400 | -1.42504700 |
| C     | -0.20768500 | 11.90741300 | 4.57448800  |
| C     | -0.28603400 | 13.23751500 | 4.85570200  |
| C     | 0.87043700  | 10.05507600 | 3.29114100  |
| H     | 0.23559700  | 9.31290800  | 3.77082200  |
| C     | 1.83212900  | 9.65055200  | 2.35947700  |
| C     | 2.65559400  | 10.66502500 | 1.76684800  |
| C     | 3.68302400  | 10.26568700 | 0.80837300  |
| C     | 3.82593700  | 8.88900600  | 0.48119200  |
| C     | 2.96745300  | 7.91102900  | 1.09034700  |
| H     | 3.10048000  | 6.86651300  | 0.81852600  |
| C     | 2.01560400  | 8.27300300  | 1.99167900  |
| H     | 1.37518800  | 7.52479300  | 2.45218600  |
| C     | 4.84027600  | 8.53956100  | -0.43743600 |
| H     | 4.98204000  | 7.49510500  | -0.70539600 |
| C     | 5.64735100  | 9.52164600  | -0.96894700 |
| C     | 5.40578200  | 10.86333000 | -0.59486800 |
| C     | 6.36754600  | 11.91815200 | -1.09856400 |
| C     | -3.00350600 | 14.45456600 | 7.95957700  |

|   |             |             |             |
|---|-------------|-------------|-------------|
| C | -1.62531300 | 14.58353200 | 8.15016500  |
| C | -0.74016000 | 14.21136800 | 7.13986700  |
| C | -1.22156500 | 13.70662500 | 5.92079900  |
| C | -2.60545800 | 13.57282200 | 5.74249200  |
| C | -3.49091900 | 13.94663500 | 6.75542900  |
| H | -3.69205400 | 14.74528500 | 8.74815100  |
| H | -1.23830500 | 14.96678700 | 9.09034700  |
| H | 0.33168800  | 14.29646900 | 7.29883000  |
| H | -2.98391100 | 13.17600500 | 4.80470800  |
| H | -4.56119000 | 13.84048300 | 6.60085100  |
| C | 6.88948800  | 14.18769200 | -1.79435500 |
| H | 7.75892800  | 13.66541700 | -2.19941900 |
| C | 0.32411000  | 15.62011200 | 4.33630500  |
| C | -0.68780900 | 16.18297600 | 3.33705600  |
| H | 1.30170100  | 16.07539600 | 4.17745200  |
| H | 0.00803100  | 15.82012800 | 5.35876600  |
| H | -0.77766700 | 17.26678500 | 3.47207300  |
| H | -0.36016100 | 15.99290000 | 2.31133200  |
| H | -1.67856300 | 15.73887700 | 3.48216100  |
| H | 6.44906600  | 14.79996900 | -2.58702200 |
| C | 7.29986800  | 15.05935500 | -0.60625900 |
| H | 8.02754700  | 15.81500900 | -0.92563500 |
| H | 6.43526100  | 15.57670500 | -0.17688700 |
| H | 7.76159400  | 14.44701000 | 0.17464000  |
| H | -0.83084100 | 11.21552200 | 5.12997100  |
| H | 6.46259900  | 9.29624400  | -1.64671000 |
| C | 4.50561400  | 13.50389500 | -1.61510800 |
| C | 3.95481800  | 13.37937700 | -2.89608200 |
| C | 3.73546400  | 14.02389500 | -0.57157100 |
| C | 2.63804000  | 13.77570100 | -3.13373600 |

|   |            |             |             |
|---|------------|-------------|-------------|
| H | 4.56427300 | 12.97380000 | -3.69964600 |
| C | 2.41920800 | 14.41797400 | -0.81328900 |
| H | 4.13835900 | 14.07588700 | 0.43204800  |
| C | 1.87032200 | 14.29985200 | -2.09178900 |
| H | 2.21536800 | 13.67411000 | -4.13006600 |
| H | 1.83330300 | 14.80063500 | 0.01625800  |
| H | 0.84418800 | 14.60852300 | -2.27585500 |

## **L<sup>2</sup>**

| Atoms | X          | Y           | Z          |
|-------|------------|-------------|------------|
| O     | 1.94508200 | 15.02107300 | 4.39190300 |

|   |             |             |             |
|---|-------------|-------------|-------------|
| O | 5.20831900  | 14.83381700 | -0.09613600 |
| N | 1.76549300  | 12.89608200 | 2.62691400  |
| N | 3.39375900  | 12.80128800 | 0.39234200  |
| N | 0.36147500  | 14.11638900 | 5.77583300  |
| C | 1.16974300  | 14.10397300 | 4.61056500  |
| C | 0.98412500  | 12.93603400 | 3.70305100  |
| C | -0.00436100 | 11.95558800 | 4.00288200  |
| N | 6.00767400  | 13.78634700 | -1.96846600 |
| C | -0.77825400 | 12.08643300 | 5.20098600  |
| C | -0.58156400 | 13.12948500 | 6.05548900  |
| C | -0.14456800 | 10.89972100 | 3.09767700  |
| H | -0.88424100 | 10.12246700 | 3.27920600  |
| C | 0.66526800  | 10.83674500 | 1.96155600  |
| C | 1.62964000  | 11.88046300 | 1.76560700  |
| C | 2.49268500  | 11.82982100 | 0.58234800  |
| C | 2.34209100  | 10.73772200 | -0.33547300 |
| C | 1.35482800  | 9.71826900  | -0.09002000 |
| H | 1.26549900  | 8.90480700  | -0.80614400 |
| C | 0.55511800  | 9.76562000  | 1.00511400  |
| H | -0.18693900 | 8.99083200  | 1.18281300  |
| C | 3.17810400  | 10.70344400 | -1.45373100 |
| H | 3.09364600  | 9.88695200  | -2.16815100 |
| C | 4.12432900  | 11.71247600 | -1.65483800 |
| C | 4.17984100  | 12.74904100 | -0.67981800 |
| C | 5.14495000  | 13.87282400 | -0.84614000 |
| C | 5.94770500  | 12.74553200 | -2.89298400 |
| C | 5.03342100  | 11.74369500 | -2.76119400 |
| C | -2.89209900 | 13.17923100 | 9.68378200  |
| C | -1.51028400 | 12.97970800 | 9.74026500  |
| C | -0.75300800 | 12.98413100 | 8.57010800  |

|   |             |             |             |
|---|-------------|-------------|-------------|
| C | -1.36723400 | 13.19109300 | 7.32417300  |
| C | -2.75504200 | 13.38184100 | 7.27715700  |
| C | -3.51233500 | 13.37800300 | 8.45036000  |
| H | -3.48089800 | 13.17591400 | 10.59696600 |
| H | -1.02207700 | 12.81259100 | 10.69654100 |
| H | 0.31920900  | 12.81234900 | 8.61649600  |
| H | -3.23701700 | 13.53555800 | 6.31582700  |
| H | -4.58682400 | 13.53129200 | 8.39785400  |
| C | 8.69922200  | 12.49057200 | -6.18988100 |
| C | 9.16728000  | 12.35896000 | -4.87990900 |
| C | 8.28441500  | 12.46241500 | -3.80634400 |
| C | 6.91828600  | 12.70215900 | -4.02717800 |
| C | 6.45716300  | 12.82425400 | -5.34520200 |
| C | 7.34292100  | 12.72109100 | -6.41974900 |
| H | 9.38888500  | 12.41006000 | -7.02563200 |
| H | 10.22058600 | 12.16749800 | -4.69383200 |
| H | 8.64952200  | 12.34273200 | -2.78964700 |
| H | 5.40050300  | 13.00302000 | -5.52293600 |
| H | 6.97067800  | 12.82212100 | -7.43562900 |
| C | 6.86262800  | 14.97445400 | -2.17790800 |
| H | 7.15831000  | 15.31690700 | -1.18595100 |
| C | 0.47640300  | 15.34568300 | 6.58936100  |
| C | -0.40372300 | 16.47860000 | 6.05844200  |
| H | 1.52577700  | 15.63929800 | 6.55302000  |
| H | 0.21606900  | 15.10473600 | 7.61873500  |
| H | -0.26747400 | 17.37389100 | 6.67578700  |
| H | -0.12706900 | 16.72707500 | 5.03032600  |
| H | -1.46398700 | 16.20394200 | 6.08651700  |
| H | 7.75434000  | 14.66770400 | -2.72211400 |
| C | 6.13116100  | 16.09281100 | -2.92237700 |

|   |             |             |             |
|---|-------------|-------------|-------------|
| H | 6.79342800  | 16.95907100 | -3.03291200 |
| H | 5.82455700  | 15.76890100 | -3.92311600 |
| H | 5.24620500  | 16.40834700 | -2.36326000 |
| H | -1.50248400 | 11.32260800 | 5.46115600  |
| H | 5.03041400  | 10.93584500 | -3.48437600 |

### **L<sup>3</sup>**

| Atoms | X          | Y           | Z           |
|-------|------------|-------------|-------------|
| O     | 1.79424200 | 14.57094400 | 2.26749200  |
| O     | 7.49767100 | 11.07455100 | -0.86490200 |
| N     | 2.26472500 | 11.85901500 | 1.93157400  |



|   |             |             |             |
|---|-------------|-------------|-------------|
| N | 4.33147900  | 10.96781400 | 0.32821800  |
| N | 0.46492000  | 14.19841300 | 4.09224200  |
| C | 1.28549400  | 13.75571400 | 3.02917600  |
| C | 1.45485800  | 12.28593000 | 2.91100900  |
| C | 0.76447200  | 11.42180200 | 3.79216100  |
| N | 6.08689300  | 12.85501200 | -1.17047100 |
| C | -0.05953000 | 11.97713300 | 4.81983400  |
| C | -0.18585400 | 13.32732700 | 4.96312200  |
| C | 0.96105300  | 10.03653600 | 3.60663100  |
| H | 0.46729200  | 9.32818700  | 4.26728400  |
| C | 1.79425800  | 9.60010500  | 2.59902100  |
| C | 2.43842700  | 10.54866500 | 1.76560900  |
| C | 3.35760100  | 10.11031700 | 0.67385000  |
| C | 3.20723900  | 8.86615000  | 0.04264100  |
| C | 4.12411500  | 8.49215700  | -0.93888300 |
| H | 4.03117800  | 7.53162600  | -1.43841800 |
| C | 5.15661200  | 9.36386000  | -1.26619200 |
| C | 5.19696800  | 10.60654300 | -0.62074000 |
| C | 6.35809800  | 11.53666000 | -0.90517500 |
| C | -2.56637700 | 14.76809800 | 8.24258000  |
| C | -1.18238600 | 14.95993800 | 8.24936600  |
| C | -0.40785000 | 14.51440400 | 7.17956900  |
| C | -1.00821700 | 13.87222100 | 6.08440600  |
| C | -2.39607900 | 13.67635600 | 6.09074000  |
| C | -3.17059400 | 14.12399300 | 7.16292600  |
| H | -3.16856000 | 15.11591200 | 9.07735500  |
| H | -0.70385700 | 15.45004600 | 9.09279300  |
| H | 0.67039600  | 14.65034400 | 7.19607800  |
| H | -2.86533900 | 13.17268600 | 5.25034300  |
| H | -4.24586900 | 13.96817300 | 7.15212200  |

|   |             |             |             |
|---|-------------|-------------|-------------|
| C | 7.22326600  | 13.78029400 | -1.32882500 |
| H | 8.11628200  | 13.16332800 | -1.44288200 |
| C | 0.22580100  | 15.65831200 | 4.12265500  |
| C | -0.90957700 | 16.07965400 | 3.18854300  |
| H | 1.15992300  | 16.12781800 | 3.81381700  |
| H | 0.00992400  | 15.95024300 | 5.14892400  |
| H | -1.03312400 | 17.16792600 | 3.22424900  |
| H | -0.68249500 | 15.79510800 | 2.15761400  |
| H | -1.85858600 | 15.61952400 | 3.48456200  |
| H | 7.07308700  | 14.34608400 | -2.25529700 |
| C | 7.37187500  | 14.73378900 | -0.14199700 |
| H | 8.21630200  | 15.41313500 | -0.30885700 |
| H | 6.46996800  | 15.33907400 | -0.00191500 |
| H | 7.55758300  | 14.17440600 | 0.78074900  |
| H | -0.56028600 | 11.32381900 | 5.52548500  |
| H | 5.91776800  | 9.10746100  | -1.99484100 |
| C | 4.78232300  | 13.35278300 | -1.53375100 |
| C | 4.44209800  | 13.40472800 | -2.89172700 |
| C | 3.88869100  | 13.83107500 | -0.57232500 |
| C | 3.21338500  | 13.93393100 | -3.28614100 |
| H | 5.14483200  | 13.02805800 | -3.63076000 |
| C | 2.65691800  | 14.35406400 | -0.97061800 |
| H | 4.12570800  | 13.75219700 | 0.48084900  |
| C | 2.32031800  | 14.41154700 | -2.32395200 |
| H | 2.95438700  | 13.96894300 | -4.34133000 |
| H | 1.97091100  | 14.69851800 | -0.20379900 |
| H | 1.36089400  | 14.82106900 | -2.63045200 |
| H | 1.97768200  | 8.53906700  | 2.46516600  |
| H | 2.38214600  | 8.20915100  | 0.29830200  |

## L<sup>4</sup>

| Atoms | X          | Y           | Z           |
|-------|------------|-------------|-------------|
| O     | 2.54557100 | 14.32143200 | 4.90917900  |
| O     | 4.40785000 | 15.19969000 | -0.71288900 |
| N     | 1.90800000 | 12.69364000 | 2.75841600  |
| N     | 3.16203200 | 12.90793100 | 0.22690600  |
| N     | 0.59897000 | 13.79639600 | 5.99692900  |

|   |             |             |             |
|---|-------------|-------------|-------------|
| C | 1.49850800  | 13.69229100 | 4.90341900  |
| C | 1.06351900  | 12.80359800 | 3.79427900  |
| C | -0.18453300 | 12.14073300 | 3.86515400  |
| N | 5.65202400  | 14.00793000 | -2.22288200 |
| C | -1.01579100 | 12.32550500 | 5.01423600  |
| C | -0.61930300 | 13.12646100 | 6.04451700  |
| C | -0.52976000 | 11.31324600 | 2.77562200  |
| H | -1.48181700 | 10.78797900 | 2.77709600  |
| C | 0.34493900  | 11.19129200 | 1.71650500  |
| C | 1.56713900  | 11.90651200 | 1.73971800  |
| C | 2.52505600  | 11.79972500 | 0.60096200  |
| C | 2.73693500  | 10.55570400 | -0.04185300 |
| C | 3.64285900  | 10.47618000 | -1.07866300 |
| H | 3.84094500  | 9.52967800  | -1.57587000 |
| C | 4.33094100  | 11.63885900 | -1.48554900 |
| C | 4.03456600  | 12.83391300 | -0.78843100 |
| C | 4.67993500  | 14.11008700 | -1.19357600 |
| C | 5.95116100  | 12.81170600 | -2.86781200 |
| C | 5.30572400  | 11.65797700 | -2.53211800 |
| C | -3.22062000 | 13.40140400 | 9.45964100  |
| C | -1.98697800 | 12.75536500 | 9.57393400  |
| C | -1.13032800 | 12.68137200 | 8.47682800  |
| C | -1.49441700 | 13.25581100 | 7.24818700  |
| C | -2.73756600 | 13.89425500 | 7.14111500  |
| C | -3.59439900 | 13.96830600 | 8.24123800  |
| H | -3.88716600 | 13.45846900 | 10.31583300 |
| H | -1.69432400 | 12.30157100 | 10.51689400 |
| H | -0.17823900 | 12.16454400 | 8.56500300  |
| H | -3.02807400 | 14.33408900 | 6.19126100  |
| H | -4.55334300 | 14.46996400 | 8.14368900  |

|   |             |             |             |
|---|-------------|-------------|-------------|
| C | 9.00042200  | 12.57049300 | -5.89227800 |
| C | 9.35065600  | 12.86128400 | -4.57123500 |
| C | 8.36518900  | 12.96232900 | -3.59072300 |
| C | 7.01214800  | 12.77641300 | -3.91813300 |
| C | 6.67171900  | 12.47661700 | -5.24437700 |
| C | 7.66001300  | 12.37640800 | -6.22573300 |
| H | 9.76989900  | 12.49239000 | -6.65542600 |
| H | 10.39393500 | 13.00189300 | -4.30197000 |
| H | 8.64304700  | 13.17181200 | -2.56106900 |
| H | 5.62750500  | 12.32483500 | -5.50264300 |
| H | 7.37983200  | 12.14728700 | -7.25032500 |
| C | 6.20056600  | 15.30347200 | -2.67791900 |
| H | 6.29035300  | 15.92618900 | -1.78748900 |
| C | 0.99144800  | 14.78864200 | 7.02065800  |
| C | 0.58365500  | 16.21147900 | 6.63456800  |
| H | 2.07600200  | 14.72215100 | 7.11104000  |
| H | 0.54228200  | 14.50192000 | 7.97008200  |
| H | 0.91626000  | 16.91432000 | 7.40696000  |
| H | 1.04900900  | 16.49828700 | 5.68781000  |
| H | -0.50415000 | 16.30018200 | 6.53903500  |
| H | 7.19460400  | 15.13337100 | -3.08826800 |
| C | 5.29861000  | 15.98709100 | -3.70700000 |
| H | 5.73073100  | 16.95222300 | -3.99508200 |
| H | 5.19484600  | 15.37721200 | -4.61124300 |
| H | 4.30718900  | 16.16888500 | -3.28363200 |
| H | -1.95898300 | 11.79631000 | 5.09133800  |
| H | 5.57542300  | 10.73749500 | -3.03768600 |
| H | 2.21329500  | 9.66811100  | 0.30025900  |
| H | 0.08831900  | 10.57633800 | 0.85915300  |

**[AmL<sup>1</sup>(NO<sub>3</sub>)<sub>3</sub>]**

| Atoms | X          | Y           | Z          |
|-------|------------|-------------|------------|
| Am    | 3.55984900 | 14.41824300 | 1.96176200 |
| O     | 2.02958000 | 14.73081300 | 3.98744000 |
| O     | 5.60418800 | 13.72834600 | 0.55659300 |
| N     | 1.86233700 | 12.40510600 | 2.66191200 |
| N     | 3.56618000 | 12.05252600 | 0.59741300 |
| N     | 0.33380000 | 14.16403500 | 5.41459700 |
| C     | 1.18169300 | 13.89957200 | 4.35673700 |

|   |             |             |             |
|---|-------------|-------------|-------------|
| C | 1.03087500  | 12.60628400 | 3.68013300  |
| O | 4.59564400  | 12.72561000 | 3.52292300  |
| C | 0.05110500  | 11.67163600 | 4.09922500  |
| O | 5.22231700  | 14.79165400 | 3.76894400  |
| N | 6.02643400  | 13.38347800 | -1.64790300 |
| C | -0.78099000 | 12.03841600 | 5.20527300  |
| O | 6.03210400  | 13.24533100 | 5.09384600  |
| N | 3.78389900  | 17.28932700 | 1.51565400  |
| C | -0.63383000 | 13.24089300 | 5.83428500  |
| O | 4.77294600  | 16.48074500 | 1.35939400  |
| N | 1.84699500  | 14.52107500 | -0.51615600 |
| O | 3.86859200  | 18.47566900 | 1.27582400  |
| N | 5.31648400  | 13.57489600 | 4.16814700  |
| O | 2.69934000  | 16.74565200 | 1.94413500  |
| O | 3.09555900  | 14.81169900 | -0.55690900 |
| O | 1.16957000  | 14.45063400 | -1.53088200 |
| O | 1.36528600  | 14.28224100 | 0.64419500  |
| C | -0.00960000 | 10.45794300 | 3.40028200  |
| H | -0.73535800 | 9.70051300  | 3.68620300  |
| C | 0.86896800  | 10.21805700 | 2.33708900  |
| C | 1.79732500  | 11.25041300 | 1.99402100  |
| C | 2.72058300  | 11.05061500 | 0.89479600  |
| C | 2.72009700  | 9.81822900  | 0.19614100  |
| C | 1.77423300  | 8.79847900  | 0.56782400  |
| H | 1.78096700  | 7.86243200  | 0.01590700  |
| C | 0.88727900  | 8.99063100  | 1.58307300  |
| H | 0.17824800  | 8.21128300  | 1.84836700  |
| C | 3.67453000  | 9.66938300  | -0.83042300 |
| H | 3.72796000  | 8.73587900  | -1.38435700 |
| C | 4.54297800  | 10.70548600 | -1.12495700 |

|   |             |             |             |
|---|-------------|-------------|-------------|
| C | 4.44822800  | 11.90384000 | -0.38734900 |
| C | 5.39315300  | 13.08776500 | -0.48873600 |
| C | -3.18011800 | 14.09005700 | 9.18904200  |
| C | -1.82503700 | 13.81756300 | 9.39516300  |
| C | -0.98914500 | 13.55991300 | 8.30937500  |
| C | -1.50172300 | 13.57490100 | 7.00203400  |
| C | -2.86372500 | 13.84023600 | 6.80356000  |
| C | -3.69769000 | 14.09933400 | 7.89330400  |
| H | -3.82930600 | 14.29118800 | 10.03650400 |
| H | -1.41903500 | 13.79915600 | 10.40254500 |
| H | 0.06155600  | 13.33538800 | 8.47337100  |
| H | -3.26552900 | 13.84596300 | 5.79430200  |
| H | -4.75068200 | 14.30817300 | 7.72701700  |
| C | 7.03026500  | 14.48069000 | -1.62123100 |
| H | 7.52927200  | 14.43153800 | -0.65236300 |
| C | 0.44213300  | 15.52897400 | 5.99692900  |
| C | -0.32441900 | 16.56735000 | 5.17700700  |
| H | 1.50547900  | 15.77004400 | 6.01964200  |
| H | 0.07267200  | 15.48308500 | 7.01921600  |
| H | -0.20878100 | 17.55068600 | 5.64524200  |
| H | 0.06865500  | 16.63074200 | 4.15886600  |
| H | -1.39339900 | 16.33167500 | 5.13829400  |
| H | 7.76045100  | 14.24675800 | -2.40169000 |
| C | 6.41743600  | 15.86382600 | -1.84206600 |
| H | 7.21933800  | 16.61024200 | -1.87038800 |
| H | 5.87554300  | 15.91080800 | -2.79257000 |
| H | 5.73674400  | 16.12558300 | -1.02845300 |
| H | -1.52819200 | 11.34575300 | 5.57470500  |
| H | 5.28180700  | 10.59894400 | -1.90863300 |
| C | 5.54913200  | 12.96325200 | -2.93846000 |



|   |            |             |             |
|---|------------|-------------|-------------|
| C | 6.41618500 | 12.27989800 | -3.80105000 |
| C | 4.24681400 | 13.27834700 | -3.34523900 |
| C | 5.97234000 | 11.89373600 | -5.06543400 |
| H | 7.42621500 | 12.04698700 | -3.47492300 |
| C | 3.81030700 | 12.87633800 | -4.60987800 |
| H | 3.59336000 | 13.84087800 | -2.68433100 |
| C | 4.66653800 | 12.18676100 | -5.46994800 |
| H | 6.64510000 | 11.36159100 | -5.73226100 |
| H | 2.79893600 | 13.11985400 | -4.92230200 |
| H | 4.32266800 | 11.88450300 | -6.45521900 |

**[AmL<sup>2</sup>(NO<sub>3</sub>)<sub>3</sub>]**

| Atoms | X          | Y           | Z          |
|-------|------------|-------------|------------|
| Am    | 3.31022900 | 14.83830700 | 1.93015800 |
| O     | 2.03311900 | 14.79728100 | 4.16948300 |
| O     | 5.18335300 | 14.50930100 | 0.18027100 |
| N     | 1.76713600 | 12.65556300 | 2.58250700 |
| N     | 3.33774000 | 12.56660300 | 0.41384300 |
| N     | 0.42232500 | 14.05950200 | 5.61856100 |
| C     | 1.20363500 | 13.92775900 | 4.48574900 |
| C     | 0.99565700 | 12.73066500 | 3.66291500 |
| O     | 4.69536600 | 13.05884300 | 3.06976800 |

|   |             |             |             |
|---|-------------|-------------|-------------|
| C | 0.01583300  | 11.76590300 | 4.00422300  |
| O | 5.14448400  | 15.11788900 | 3.59872000  |
| N | 5.92918400  | 13.69991300 | -1.82699800 |
| C | -0.74061700 | 11.99041100 | 5.19839100  |
| O | 6.24240300  | 13.48449100 | 4.56226900  |
| N | 3.32038200  | 17.74867200 | 1.86063200  |
| C | -0.53286100 | 13.09725300 | 5.97156900  |
| O | 4.32546500  | 17.04000600 | 1.48880700  |
| N | 1.30542700  | 15.13960000 | -0.27296100 |
| O | 3.31874500  | 18.96094500 | 1.80204400  |
| N | 5.39771900  | 13.87311000 | 3.77797600  |
| O | 2.31227500  | 17.07771700 | 2.30092500  |
| O | 2.53845500  | 15.43679300 | -0.44807200 |
| O | 0.47269200  | 15.25504900 | -1.15499400 |
| O | 1.00205200  | 14.68827600 | 0.89285600  |
| C | -0.12504400 | 10.66787800 | 3.14020900  |
| H | -0.86050900 | 9.89666200  | 3.35598500  |
| C | 0.67651700  | 10.57138600 | 1.99808600  |
| C | 1.62201200  | 11.61480200 | 1.76054100  |
| C | 2.46889300  | 11.56798800 | 0.58562500  |
| C | 2.35972800  | 10.47764700 | -0.32971900 |
| C | 1.39193400  | 9.44158300  | -0.05352900 |
| H | 1.30988400  | 8.61493000  | -0.75403000 |
| C | 0.59582000  | 9.48568500  | 1.04878200  |
| H | -0.12577300 | 8.69448200  | 1.23340400  |
| C | 3.19676600  | 10.48492100 | -1.45000500 |
| H | 3.13428700  | 9.68236100  | -2.18097100 |
| C | 4.12113700  | 11.52760000 | -1.63041800 |
| C | 4.15197200  | 12.53872300 | -0.63828800 |
| C | 5.11158100  | 13.64937100 | -0.71049800 |

|   |             |             |             |
|---|-------------|-------------|-------------|
| C | 5.89367200  | 12.70911100 | -2.81396800 |
| C | 5.03108300  | 11.65267600 | -2.72731100 |
| C | -2.85288700 | 13.50220700 | 9.56496600  |
| C | -1.48469000 | 13.22941300 | 9.64701400  |
| C | -0.72193600 | 13.11645400 | 8.48547600  |
| C | -1.32148600 | 13.27787100 | 7.22570800  |
| C | -2.69598600 | 13.54268400 | 7.15107800  |
| C | -3.45664100 | 13.65691500 | 8.31662100  |
| H | -3.44499800 | 13.59085000 | 10.47142400 |
| H | -1.01144900 | 13.09812900 | 10.61595800 |
| H | 0.33921700  | 12.89103200 | 8.55193300  |
| H | -3.16454300 | 13.66314100 | 6.17847400  |
| H | -4.52000900 | 13.86757900 | 8.24628800  |
| C | 8.56600700  | 12.83944000 | -6.17545100 |
| C | 9.07073900  | 12.59954200 | -4.89448000 |
| C | 8.21227100  | 12.57613800 | -3.79628600 |
| C | 6.83561100  | 12.79468900 | -3.96827300 |
| C | 6.33544500  | 13.02571500 | -5.25725500 |
| C | 7.19855500  | 13.05083400 | -6.35476500 |
| H | 9.23709600  | 12.85879500 | -7.02951600 |
| H | 10.13313700 | 12.42447100 | -4.75041800 |
| H | 8.60579100  | 12.37623900 | -2.80308400 |
| H | 5.27076000  | 13.19140100 | -5.39480100 |
| H | 6.80001100  | 13.23698100 | -7.34804000 |
| C | 6.73214900  | 14.94502100 | -1.96881000 |
| H | 7.07051200  | 15.20756300 | -0.96635400 |
| C | 0.57293500  | 15.34577900 | 6.35160300  |
| C | -0.22165200 | 16.47763700 | 5.69866800  |
| H | 1.63863800  | 15.57776100 | 6.34955800  |
| H | 0.25329300  | 15.18140700 | 7.37842300  |

|   |             |             |             |
|---|-------------|-------------|-------------|
| H | -0.07936000 | 17.39574400 | 6.27881300  |
| H | 0.12691400  | 16.66579000 | 4.67975300  |
| H | -1.29286700 | 16.24958400 | 5.67905000  |
| H | 7.60047800  | 14.71614200 | -2.58310700 |
| C | 5.90617500  | 16.08222400 | -2.57201900 |
| H | 6.52026700  | 16.98797300 | -2.61761800 |
| H | 5.58044100  | 15.83770400 | -3.58890800 |
| H | 5.02748600  | 16.29757300 | -1.95797400 |
| H | -1.47825100 | 11.26373300 | 5.51846800  |
| H | 5.05873700  | 10.89304800 | -3.49973700 |

**[AmL<sup>3</sup>(NO<sub>3</sub>)<sub>3</sub>]**

| Atoms | X          | Y           | Z          |
|-------|------------|-------------|------------|
| Am    | 3.59339600 | 14.34982300 | 2.01825700 |
| O     | 2.17300500 | 14.60716200 | 4.08635300 |
| O     | 5.60682900 | 13.76198800 | 0.57962900 |
| N     | 1.94377500 | 12.28523600 | 2.72401400 |
| N     | 3.60319900 | 11.98600200 | 0.63722900 |
| N     | 0.40159100 | 14.11630400 | 5.44211600 |
| C     | 1.27337400 | 13.81180600 | 4.41135200 |
| C     | 1.08045500 | 12.53627500 | 3.71975500 |
| O     | 4.74814200 | 12.64830400 | 3.47935400 |
| C     | 0.03278500 | 11.67241300 | 4.09140500 |
| O     | 5.31203200 | 14.72675200 | 3.76928800 |

|   |             |             |             |
|---|-------------|-------------|-------------|
| N | 5.96991200  | 13.43976700 | -1.63832200 |
| C | -0.81917200 | 12.06515700 | 5.16684700  |
| O | 6.23633500  | 13.16798800 | 5.00134100  |
| N | 3.68669800  | 17.23944700 | 1.61229600  |
| C | -0.62861200 | 13.25164500 | 5.81896800  |
| O | 4.70511500  | 16.47623600 | 1.42356600  |
| N | 1.79653400  | 14.42041200 | -0.40565400 |
| O | 3.71780600  | 18.43315100 | 1.39567900  |
| N | 5.46708100  | 13.50150000 | 4.12097200  |
| O | 2.63271800  | 16.64300000 | 2.04705500  |
| O | 3.03592000  | 14.74185800 | -0.48115700 |
| O | 1.09412900  | 14.33113100 | -1.40221500 |
| O | 1.35174200  | 14.17216700 | 0.76664400  |
| C | -0.08240300 | 10.47324900 | 3.35199800  |
| H | -0.87577500 | 9.76784800  | 3.58276600  |
| C | 0.81229300  | 10.21493900 | 2.33546700  |
| C | 1.83540300  | 11.15002700 | 2.03698400  |
| C | 2.83189000  | 10.93273800 | 0.95353300  |
| C | 2.99303000  | 9.69765000  | 0.30895600  |
| C | 3.96276600  | 9.57560400  | -0.68081600 |
| H | 4.11597100  | 8.62425000  | -1.18136400 |
| C | 4.74213800  | 10.67962800 | -1.01799600 |
| C | 4.52399800  | 11.87616900 | -0.32920500 |
| C | 5.39274300  | 13.11216400 | -0.45981900 |
| C | -3.24825800 | 14.20144500 | 9.08819800  |
| C | -1.91382300 | 13.87103400 | 9.33940500  |
| C | -1.05287800 | 13.58093500 | 8.28183600  |
| C | -1.51951500 | 13.62089000 | 6.95787000  |
| C | -2.86148400 | 13.94415600 | 6.71389600  |
| C | -3.72030700 | 14.23603300 | 7.77560700  |

|   |             |             |             |
|---|-------------|-------------|-------------|
| H | -3.91692000 | 14.42805800 | 9.91378700  |
| H | -1.54370500 | 13.83295300 | 10.35996000 |
| H | -0.01888200 | 13.31165300 | 8.48083400  |
| H | -3.22772100 | 13.97054900 | 5.69153500  |
| H | -4.75699400 | 14.49049300 | 7.57427700  |
| C | 6.91475400  | 14.58856300 | -1.64663800 |
| H | 7.44200600  | 14.57362500 | -0.69172100 |
| C | 0.56437600  | 15.47297700 | 6.03415400  |
| C | -0.08586100 | 16.55889400 | 5.17578200  |
| H | 1.63790700  | 15.64533600 | 6.11930500  |
| H | 0.13372200  | 15.44988100 | 7.03280900  |
| H | 0.05265900  | 17.52948400 | 5.66413200  |
| H | 0.37738200  | 16.61062800 | 4.18703500  |
| H | -1.16153500 | 16.38437100 | 5.06456700  |
| H | 7.63468700  | 14.38716000 | -2.44544900 |
| C | 6.22375200  | 15.93550000 | -1.85960200 |
| H | 6.98410800  | 16.72259500 | -1.91688800 |
| H | 5.65244500  | 15.94555000 | -2.79379700 |
| H | 5.55422900  | 16.16819300 | -1.02820300 |
| H | -1.61836600 | 11.41109000 | 5.49542300  |
| H | 5.50176200  | 10.61172300 | -1.78603000 |
| C | 5.48089400  | 12.98287300 | -2.91261100 |
| C | 6.35994100  | 12.33941100 | -3.79333100 |
| C | 4.15375700  | 13.22579400 | -3.28650800 |
| C | 5.90426600  | 11.92008400 | -5.04284600 |
| H | 7.38946800  | 12.16364700 | -3.49319700 |
| C | 3.70625400  | 12.79138500 | -4.53651200 |
| H | 3.48966400  | 13.75962600 | -2.61263100 |
| C | 4.57477000  | 12.14071600 | -5.41441700 |
| H | 6.58660900  | 11.41889600 | -5.72376900 |

|   |            |             |             |
|---|------------|-------------|-------------|
| H | 2.67577000 | 12.97932700 | -4.82390300 |
| H | 4.22159300 | 11.81289200 | -6.38815800 |
| H | 0.71418800 | 9.30449200  | 1.75589200  |
| H | 2.39472200 | 8.83848600  | 0.58824200  |

**[AmL<sup>4</sup>(NO<sub>3</sub>)<sub>3</sub>]**

| Atoms | X           | Y           | Z           |
|-------|-------------|-------------|-------------|
| Am    | 3.21988000  | 14.79015000 | 1.84897500  |
| O     | 1.96156500  | 14.80380500 | 4.05009000  |
| O     | 5.16443500  | 14.40977200 | 0.25155700  |
| N     | 1.67002200  | 12.60640400 | 2.50248400  |
| N     | 3.26703900  | 12.48104800 | 0.38418900  |
| N     | 0.42036600  | 14.07271100 | 5.56883700  |
| C     | 1.15849600  | 13.92458600 | 4.40644000  |
| C     | 0.93567200  | 12.70984300 | 3.61796100  |
| O     | 4.52423900  | 13.05840700 | 3.15693400  |
| C     | -0.01548900 | 11.75482700 | 4.02766400  |
| O     | 5.04021900  | 15.13768800 | 3.52067300  |
| N     | 5.93216200  | 13.66186600 | -1.76664800 |
| C     | -0.73226800 | 11.98993300 | 5.23908000  |

|   |             |             |             |
|---|-------------|-------------|-------------|
| O | 6.05783100  | 13.55363000 | 4.64163900  |
| N | 3.20686500  | 17.70041500 | 1.68700200  |
| C | -0.50865900 | 13.11534500 | 5.98265800  |
| O | 4.22470800  | 16.99054500 | 1.35472600  |
| N | 1.30232600  | 15.01152000 | -0.44326200 |
| O | 3.19482600  | 18.91046600 | 1.58912700  |
| N | 5.24294500  | 13.90419600 | 3.80832400  |
| O | 2.19804800  | 17.03456900 | 2.13257300  |
| O | 2.54048200  | 15.30946900 | -0.57923500 |
| O | 0.50678200  | 15.08801700 | -1.36343100 |
| O | 0.95304500  | 14.60304000 | 0.72470000  |
| C | -0.16945800 | 10.62615300 | 3.19124200  |
| H | -0.88244000 | 9.84970800  | 3.45417400  |
| C | 0.59087900  | 10.52119400 | 2.04540900  |
| C | 1.51581500  | 11.54269000 | 1.71380300  |
| C | 2.37141500  | 11.49989800 | 0.50034800  |
| C | 2.27329600  | 10.48878300 | -0.48817100 |
| C | 3.10872400  | 10.51799000 | -1.58535500 |
| H | 3.03111100  | 9.75778000  | -2.35766500 |
| C | 4.07313900  | 11.54537200 | -1.70326400 |
| C | 4.10364800  | 12.49408600 | -0.66288500 |
| C | 5.08613900  | 13.58365700 | -0.67130800 |
| C | 5.89298400  | 12.72643300 | -2.80082900 |
| C | 4.99906900  | 11.69123800 | -2.77861900 |
| C | -2.69732900 | 13.57525400 | 9.65043600  |
| C | -1.32572900 | 13.30995100 | 9.68722000  |
| C | -0.60528400 | 13.17942000 | 8.50074900  |
| C | -1.25156700 | 13.31564100 | 7.26133300  |
| C | -2.62924200 | 13.57267600 | 7.23209300  |
| C | -3.34720500 | 13.70476100 | 8.42252100  |



|   |             |             |             |
|---|-------------|-------------|-------------|
| H | -3.25635600 | 13.67759100 | 10.57624000 |
| H | -0.81670100 | 13.19831200 | 10.64033600 |
| H | 0.45874900  | 12.96012300 | 8.53221100  |
| H | -3.13390200 | 13.67311400 | 6.27539300  |
| H | -4.41349700 | 13.90932600 | 8.38752100  |
| C | 8.61648000  | 12.95749000 | -6.11491900 |
| C | 9.09258900  | 12.61611800 | -4.84612700 |
| C | 8.21807300  | 12.55881500 | -3.76184100 |
| C | 6.85431000  | 12.84490700 | -3.93617000 |
| C | 6.38213100  | 13.17761300 | -5.21338100 |
| C | 7.26148700  | 13.23653500 | -6.29657900 |
| H | 9.30002600  | 13.00304600 | -6.95803600 |
| H | 10.14486600 | 12.38865900 | -4.70098800 |
| H | 8.58874700  | 12.28122500 | -2.77857400 |
| H | 5.32711400  | 13.39538300 | -5.35280300 |
| H | 6.88526000  | 13.50156300 | -7.28058100 |
| C | 6.78228400  | 14.88327900 | -1.82332100 |
| H | 7.12017400  | 15.07004300 | -0.80378800 |
| C | 0.59588800  | 15.37302200 | 6.27229200  |
| C | -0.22387600 | 16.49184900 | 5.62822900  |
| H | 1.66038300  | 15.60587900 | 6.22812200  |
| H | 0.31285800  | 15.22630100 | 7.31236400  |
| H | -0.06273800 | 17.41991900 | 6.18715100  |
| H | 0.08786000  | 16.66294100 | 4.59459500  |
| H | -1.29466100 | 16.26196800 | 5.65117700  |
| H | 7.64702700  | 14.65773200 | -2.44386300 |
| C | 6.00870500  | 16.08790900 | -2.36127400 |
| H | 6.66505300  | 16.96474800 | -2.35806400 |
| H | 5.67306200  | 15.91496500 | -3.38949800 |
| H | 5.14157700  | 16.31074500 | -1.73424700 |

|   |             |             |             |
|---|-------------|-------------|-------------|
| H | -1.44869700 | 11.26048000 | 5.59849700  |
| H | 5.01451500  | 10.96972400 | -3.58706200 |
| H | 1.53555700  | 9.69972700  | -0.40037500 |
| H | 0.47679200  | 9.65251800  | 1.40746000  |

**[EuL<sup>1</sup>(NO<sub>3</sub>)<sub>3</sub>]**

| Atoms | X           | Y           | Z           |
|-------|-------------|-------------|-------------|
| Eu    | 3.54963700  | 14.39062600 | 1.95585200  |
| O     | 2.06282900  | 14.68935800 | 3.97693400  |
| O     | 5.56450900  | 13.72105300 | 0.57888700  |
| N     | 1.86442200  | 12.37454200 | 2.66064800  |
| N     | 3.55311900  | 12.03247400 | 0.60387400  |
| N     | 0.35483000  | 14.15368500 | 5.40195200  |
| C     | 1.20236300  | 13.87360300 | 4.34838800  |
| C     | 1.03472200  | 12.58098200 | 3.67649400  |
| O     | 4.58080000  | 12.72835100 | 3.49031200  |
| C     | 0.04531400  | 11.65622500 | 4.09440200  |
| O     | 5.17677000  | 14.80368700 | 3.72687700  |
| N     | 6.01680000  | 13.38602000 | -1.62100400 |
| C     | -0.78367600 | 12.03765100 | 5.19836000  |
| O     | 5.99752700  | 13.27806600 | 5.06642400  |
| N     | 3.76128500  | 17.22964600 | 1.54195500  |

|   |             |             |             |
|---|-------------|-------------|-------------|
| C | -0.62393300 | 13.24188800 | 5.82231300  |
| O | 4.74138400  | 16.43188100 | 1.32015500  |
| N | 1.82320300  | 14.50078800 | -0.45994300 |
| O | 3.82765600  | 18.42252600 | 1.32460300  |
| N | 5.28321600  | 13.59122000 | 4.13295200  |
| O | 2.70067100  | 16.67422600 | 2.01276300  |
| O | 3.07648500  | 14.77059200 | -0.51027700 |
| O | 1.13757300  | 14.44362000 | -1.47046500 |
| O | 1.34703400  | 14.27170900 | 0.70207600  |
| C | -0.02465200 | 10.44229900 | 3.39520200  |
| H | -0.75702000 | 9.69074300  | 3.67986800  |
| C | 0.85336000  | 10.19662700 | 2.33164000  |
| C | 1.78797500  | 11.22328300 | 1.99178300  |
| C | 2.70913900  | 11.02751600 | 0.89210200  |
| C | 2.70591100  | 9.80048000  | 0.18550700  |
| C | 1.75608500  | 8.78257800  | 0.55436500  |
| H | 1.75856100  | 7.84879300  | -0.00148500 |
| C | 0.86895500  | 8.97278100  | 1.57090500  |
| H | 0.15768500  | 8.19362800  | 1.83093700  |
| C | 3.65992100  | 9.65981100  | -0.84293200 |
| H | 3.71362000  | 8.73115200  | -1.40497200 |
| C | 4.52799900  | 10.69919300 | -1.12978600 |
| C | 4.43373800  | 11.89190500 | -0.38232500 |
| C | 5.37181000  | 13.08245400 | -0.47026500 |
| C | -3.16882000 | 14.13115600 | 9.16786700  |
| C | -1.81533600 | 13.85338100 | 9.37751900  |
| C | -0.97974500 | 13.58278100 | 8.29469200  |
| C | -1.49087600 | 13.58970100 | 6.98665800  |
| C | -2.85125100 | 13.86071000 | 6.78479000  |
| C | -3.68496200 | 14.13283300 | 7.87153800  |

|   |             |             |             |
|---|-------------|-------------|-------------|
| H | -3.81779300 | 14.34244600 | 10.01302900 |
| H | -1.41040600 | 13.84102100 | 10.38543700 |
| H | 0.06966900  | 13.35442400 | 8.46155500  |
| H | -3.25181200 | 13.86106300 | 5.77503700  |
| H | -4.73663900 | 14.34605400 | 7.70244700  |
| C | 7.01553400  | 14.48740600 | -1.57910000 |
| H | 7.49797900  | 14.44051800 | -0.60180800 |
| C | 0.48060900  | 15.52089200 | 5.97576300  |
| C | -0.23011800 | 16.57279400 | 5.12302200  |
| H | 1.54901400  | 15.73436000 | 6.03042900  |
| H | 0.07766700  | 15.49419000 | 6.98587200  |
| H | -0.11517500 | 17.55393900 | 5.59614500  |
| H | 0.20775600  | 16.62774100 | 4.12296800  |
| H | -1.30101700 | 16.35798000 | 5.03968700  |
| H | 7.75983300  | 14.25510500 | -2.34677200 |
| C | 6.40264500  | 15.86873000 | -1.81124600 |
| H | 7.20379600  | 16.61629300 | -1.83116500 |
| H | 5.87372700  | 15.91250400 | -2.76924400 |
| H | 5.71130100  | 16.13146900 | -1.00690200 |
| H | -1.53952300 | 11.35593800 | 5.57065000  |
| H | 5.26586200  | 10.59904100 | -1.91527900 |
| C | 5.54704600  | 12.97603000 | -2.91744000 |
| C | 6.41971200  | 12.30422500 | -3.78323900 |
| C | 4.24503400  | 13.29082000 | -3.32601600 |
| C | 5.98200200  | 11.92916000 | -5.05314600 |
| H | 7.42922900  | 12.07146500 | -3.45547200 |
| C | 3.81480800  | 12.89984600 | -4.59618400 |
| H | 3.58695900  | 13.84341000 | -2.66104200 |
| C | 4.67680100  | 12.22178300 | -5.45974800 |
| H | 6.65905600  | 11.40584100 | -5.72261100 |

|   |            |             |             |
|---|------------|-------------|-------------|
| H | 2.80379700 | 13.14269700 | -4.91034500 |
| H | 4.33772600 | 11.92813700 | -6.44928100 |

**[EuL<sup>2</sup>(NO<sub>3</sub>)<sub>3</sub>]**

| Atoms | X           | Y           | Z           |
|-------|-------------|-------------|-------------|
| Eu    | 3.32161500  | 14.80282000 | 1.93022100  |
| O     | 2.07573700  | 14.74812900 | 4.15427400  |
| O     | 5.16793400  | 14.48082600 | 0.20883800  |
| N     | 1.78240600  | 12.61299500 | 2.58284900  |
| N     | 3.33954500  | 12.53340200 | 0.42583900  |
| N     | 0.44349200  | 14.04853800 | 5.59876000  |
| C     | 1.23075000  | 13.89612000 | 4.47302300  |
| C     | 1.00808900  | 12.69740200 | 3.65783400  |
| O     | 4.68609100  | 13.05807800 | 3.05984600  |
| C     | 0.01532000  | 11.74540200 | 3.99719700  |
| O     | 5.11827300  | 15.12539500 | 3.56767600  |
| N     | 5.91320300  | 13.70059000 | -1.81035700 |
| C     | -0.74358800 | 11.98901200 | 5.18653900  |
| O     | 6.21966800  | 13.51101100 | 4.55564100  |
| N     | 3.36281300  | 17.67468800 | 1.89924400  |
| C     | -0.52586500 | 13.10002200 | 5.95212500  |
| O     | 4.32699500  | 16.97386300 | 1.43120700  |

|   |             |             |             |
|---|-------------|-------------|-------------|
| N | 1.30528100  | 15.11344100 | -0.19813900 |
| O | 3.36473500  | 18.88922600 | 1.87777300  |
| N | 5.37666800  | 13.88474200 | 3.76111400  |
| O | 2.38491000  | 16.99929800 | 2.39752300  |
| O | 2.54228600  | 15.37667700 | -0.39839200 |
| O | 0.46098500  | 15.24189000 | -1.06807100 |
| O | 1.01055600  | 14.68572500 | 0.97614600  |
| C | -0.13236300 | 10.64541300 | 3.13557100  |
| H | -0.87633000 | 9.88195100  | 3.34991600  |
| C | 0.67297500  | 10.53979000 | 1.99571100  |
| C | 1.62677400  | 11.57529500 | 1.76191900  |
| C | 2.47384300  | 11.53138800 | 0.58893100  |
| C | 2.36383200  | 10.44705800 | -0.33241100 |
| C | 1.39175300  | 9.41350100  | -0.05878100 |
| H | 1.30718200  | 8.58875600  | -0.76129600 |
| C | 0.59197400  | 9.45740500  | 1.04197400  |
| H | -0.13302400 | 8.66783100  | 1.22044900  |
| C | 3.20104300  | 10.46257400 | -1.45319600 |
| H | 3.13924700  | 9.66565700  | -2.19040700 |
| C | 4.12240200  | 11.50980100 | -1.62687400 |
| C | 4.15151900  | 12.51305700 | -0.62690900 |
| C | 5.10209700  | 13.63059100 | -0.69079900 |
| C | 5.88364800  | 12.71614600 | -2.80453700 |
| C | 5.03046500  | 11.65105700 | -2.72387400 |
| C | -2.86153300 | 13.55784100 | 9.52914800  |
| C | -1.49507700 | 13.27950600 | 9.62121100  |
| C | -0.72709400 | 13.14955000 | 8.46494400  |
| C | -1.31944600 | 13.29907500 | 7.20025400  |
| C | -2.69221200 | 13.56986500 | 7.11579500  |
| C | -3.45816700 | 13.70117100 | 8.27603600  |

|   |             |             |             |
|---|-------------|-------------|-------------|
| H | -3.45773900 | 13.65981300 | 10.43152300 |
| H | -1.02731100 | 13.15718800 | 10.59399300 |
| H | 0.33264000  | 12.92004700 | 8.53940800  |
| H | -3.15506900 | 13.68205500 | 6.13949600  |
| H | -4.52007500 | 13.91645000 | 8.19787200  |
| C | 8.55367600  | 12.88642400 | -6.16600800 |
| C | 9.06358700  | 12.66931400 | -4.88299300 |
| C | 8.20557100  | 12.63361900 | -3.78486800 |
| C | 6.82382200  | 12.81658000 | -3.95864700 |
| C | 6.31891700  | 13.02512500 | -5.24966800 |
| C | 7.18151300  | 13.06271000 | -6.34718300 |
| H | 9.22445000  | 12.91557100 | -7.02004500 |
| H | 10.12990100 | 12.52150000 | -4.73729300 |
| H | 8.60361400  | 12.45106100 | -2.79014600 |
| H | 5.25064800  | 13.16440500 | -5.38859600 |
| H | 6.77891200  | 13.23150100 | -7.34193100 |
| C | 6.69030900  | 14.96262800 | -1.94832100 |
| H | 7.04471300  | 15.21550200 | -0.94880400 |
| C | 0.60829100  | 15.34020700 | 6.31955900  |
| C | -0.13006500 | 16.48720800 | 5.62753100  |
| H | 1.68013200  | 15.54136300 | 6.34887400  |
| H | 0.25135700  | 15.19914300 | 7.33741600  |
| H | 0.00907000  | 17.40398100 | 6.21067900  |
| H | 0.26729400  | 16.66290900 | 4.62449100  |
| H | -1.20469300 | 16.28455500 | 5.56306500  |
| H | 7.54934800  | 14.76056500 | -2.58451000 |
| C | 5.82969600  | 16.09346700 | -2.51454800 |
| H | 6.42653600  | 17.01065600 | -2.56092100 |
| H | 5.48463500  | 15.85773100 | -3.52719700 |
| H | 4.96224700  | 16.28407200 | -1.87680800 |

|   |             |             |             |
|---|-------------|-------------|-------------|
| H | -1.49203000 | 11.27479700 | 5.50965500  |
| H | 5.06476000  | 10.89714800 | -3.50164100 |

**[EuL<sup>3</sup>(NO<sub>3</sub>)<sub>3</sub>]**

| Atoms | X           | Y           | Z           |
|-------|-------------|-------------|-------------|
| Eu    | 3.56671400  | 14.32501800 | 2.00099400  |
| O     | 2.18491800  | 14.57332600 | 4.04927800  |
| O     | 5.55635700  | 13.75026800 | 0.60948200  |
| N     | 1.93607400  | 12.24969800 | 2.71460600  |
| N     | 3.58468300  | 11.95965800 | 0.64322200  |
| N     | 0.41801900  | 14.10812100 | 5.41976700  |
| C     | 1.28317200  | 13.78796000 | 4.38882800  |
| C     | 1.08010200  | 12.50702700 | 3.71225800  |
| O     | 4.70265900  | 12.67449400 | 3.47011600  |
| C     | 0.03319900  | 11.64847200 | 4.09698300  |
| O     | 5.24139300  | 14.76401500 | 3.71939300  |
| N     | 5.96120100  | 13.44337800 | -1.60301400 |
| C     | -0.81073300 | 12.05603500 | 5.17368700  |
| O     | 6.16225400  | 13.24432400 | 4.99915500  |
| N     | 3.64037600  | 17.18021500 | 1.60449300  |
| C     | -0.61257600 | 13.24970100 | 5.81129400  |
| O     | 4.65202300  | 16.42898600 | 1.36396600  |
| N     | 1.76659200  | 14.38461100 | -0.36669800 |
| O     | 3.65163100  | 18.37743000 | 1.39983200  |



|   |             |             |             |
|---|-------------|-------------|-------------|
| N | 5.40174700  | 13.54907600 | 4.09969500  |
| O | 2.61042600  | 16.57352800 | 2.07964900  |
| O | 3.01061700  | 14.68944900 | -0.44741900 |
| O | 1.06046200  | 14.30429600 | -1.36178400 |
| O | 1.32318800  | 14.14716600 | 0.80563800  |
| C | -0.08550300 | 10.44305700 | 3.36771900  |
| H | -0.87646400 | 9.73843900  | 3.60903200  |
| C | 0.80290700  | 10.17754900 | 2.34643100  |
| C | 1.82212500  | 11.11247900 | 2.03452600  |
| C | 2.81302900  | 10.90282400 | 0.94516500  |
| C | 2.96944100  | 9.67736800  | 0.28168700  |
| C | 3.93829400  | 9.56839900  | -0.71063400 |
| H | 4.08888400  | 8.62466600  | -1.22621500 |
| C | 4.72006400  | 10.67585100 | -1.03178900 |
| C | 4.50350400  | 11.86262300 | -0.32556400 |
| C | 5.36586200  | 13.10501600 | -0.43655600 |
| C | -3.20967500 | 14.24001900 | 9.08663400  |
| C | -1.87220000 | 13.91773900 | 9.33223500  |
| C | -1.01855800 | 13.61472500 | 8.27240300  |
| C | -1.49551600 | 13.63320800 | 6.95159300  |
| C | -2.84039300 | 13.94867200 | 6.71348900  |
| C | -3.69193700 | 14.25357900 | 7.77738300  |
| H | -3.87264400 | 14.47679900 | 9.91397000  |
| H | -1.49400000 | 13.89611400 | 10.35031700 |
| H | 0.01785900  | 13.35188000 | 8.46732200  |
| H | -3.21445800 | 13.95913000 | 5.69369100  |
| H | -4.73094900 | 14.50189600 | 7.58035300  |
| C | 6.90149700  | 14.59599900 | -1.58832500 |
| H | 7.40304000  | 14.58353100 | -0.61971500 |
| C | 0.59052000  | 15.47176300 | 5.99312100  |

|   |             |             |             |
|---|-------------|-------------|-------------|
| C | -0.03113200 | 16.55442200 | 5.10935400  |
| H | 1.66521500  | 15.63094200 | 6.09117800  |
| H | 0.14528900  | 15.46970700 | 6.98556000  |
| H | 0.10277900  | 17.52788200 | 5.59341400  |
| H | 0.45639300  | 16.59498800 | 4.13188700  |
| H | -1.10525500 | 16.38671400 | 4.97458500  |
| H | 7.64317700  | 14.39593500 | -2.36750700 |
| C | 6.21263700  | 15.94080200 | -1.82094800 |
| H | 6.97305500  | 16.72882400 | -1.86380600 |
| H | 5.66315000  | 15.94706600 | -2.76824300 |
| H | 5.52478000  | 16.17521600 | -1.00505800 |
| H | -1.60979800 | 11.40858600 | 5.51551700  |
| H | 5.47893200  | 10.61746100 | -1.80128700 |
| C | 5.48856900  | 12.99922700 | -2.88778100 |
| C | 6.37964700  | 12.37054400 | -3.76691000 |
| C | 4.16412300  | 13.24094000 | -3.27252500 |
| C | 5.93891700  | 11.96465500 | -5.02625300 |
| H | 7.40669700  | 12.19538400 | -3.45813600 |
| C | 3.73178900  | 12.81996400 | -4.53231900 |
| H | 3.49049100  | 13.76202300 | -2.59790700 |
| C | 4.61245900  | 12.18404100 | -5.40904500 |
| H | 6.63056300  | 11.47479700 | -5.70603900 |
| H | 2.70349400  | 13.00653100 | -4.82838500 |
| H | 4.27097300  | 11.86668500 | -6.39039800 |
| H | 0.70289300  | 9.26174000  | 1.77530500  |
| H | 2.36721600  | 8.81653600  | 0.54766400  |

**[EuL<sup>4</sup>(NO<sub>3</sub>)<sub>3</sub>]**

| Atoms | X           | Y           | Z           |
|-------|-------------|-------------|-------------|
| Eu    | 3.23732800  | 14.74486600 | 1.86505600  |
| O     | 2.05390300  | 14.71390000 | 4.06469100  |
| O     | 5.12029500  | 14.40540600 | 0.26159100  |
| N     | 1.70283000  | 12.54066800 | 2.51546900  |
| N     | 3.26329600  | 12.44636300 | 0.39254400  |
| N     | 0.46039400  | 14.04612000 | 5.55819700  |
| C     | 1.21305900  | 13.86766500 | 4.41014300  |
| C     | 0.95843400  | 12.66152300 | 3.61978400  |
| O     | 4.57038800  | 13.03165800 | 3.08682000  |
| C     | -0.02968000 | 11.73811500 | 4.01290300  |
| O     | 5.05396800  | 15.11457900 | 3.47089000  |
| N     | 5.90025400  | 13.67864800 | -1.75905000 |
| C     | -0.75537000 | 11.99958800 | 5.21397000  |
| O     | 6.12579600  | 13.53465200 | 4.54330300  |
| N     | 3.21614000  | 17.62196900 | 1.78226000  |
| C     | -0.50626400 | 13.11991800 | 5.95825800  |
| O     | 4.20060300  | 16.93503100 | 1.33704500  |
| N     | 1.26686600  | 14.98969700 | -0.31893100 |
| O     | 3.19072800  | 18.83602900 | 1.73830700  |
| N     | 5.28474100  | 13.88124800 | 3.73342600  |
| O     | 2.24878700  | 16.93417900 | 2.28373800  |

|   |             |             |             |
|---|-------------|-------------|-------------|
| O | 2.50595900  | 15.26160300 | -0.49488300 |
| O | 0.44438000  | 15.08632600 | -1.21393900 |
| O | 0.94622500  | 14.58882800 | 0.85725100  |
| C | -0.20807800 | 10.61868400 | 3.16832100  |
| H | -0.95064300 | 9.86520700  | 3.41586300  |
| C | 0.56291200  | 10.49579900 | 2.03027100  |
| C | 1.52353500  | 11.48991600 | 1.71741800  |
| C | 2.38893100  | 11.44670100 | 0.51121000  |
| C | 2.32009200  | 10.42344400 | -0.46713400 |
| C | 3.15860100  | 10.46283600 | -1.56196200 |
| H | 3.10362700  | 9.69304200  | -2.32672000 |
| C | 4.09691400  | 11.51356200 | -1.68621600 |
| C | 4.10294800  | 12.46814300 | -0.65095600 |
| C | 5.06009300  | 13.57886900 | -0.66123900 |
| C | 5.88701200  | 12.73662600 | -2.78834000 |
| C | 5.02118900  | 11.67755500 | -2.76069300 |
| C | -2.73748400 | 13.65743700 | 9.58978700  |
| C | -1.37280800 | 13.36208900 | 9.64899600  |
| C | -0.63804800 | 13.20639000 | 8.47445300  |
| C | -1.26263100 | 13.34696000 | 7.22437700  |
| C | -2.63360800 | 13.63453000 | 7.17282300  |
| C | -3.36597600 | 13.79185500 | 8.35132300  |
| H | -3.30768700 | 13.77950300 | 10.50634900 |
| H | -0.88051400 | 13.24670300 | 10.61043600 |
| H | 0.42027800  | 12.96398000 | 8.52353800  |
| H | -3.12140700 | 13.73955300 | 6.20793000  |
| H | -4.42671100 | 14.02022400 | 8.29880000  |
| C | 8.61417900  | 13.00991800 | -6.09610600 |
| C | 9.09892300  | 12.72233100 | -4.81724700 |
| C | 8.22266000  | 12.65256500 | -3.73522500 |

|   |             |             |             |
|---|-------------|-------------|-------------|
| C | 6.84797100  | 12.87179000 | -3.92161700 |
| C | 6.36784400  | 13.15071500 | -5.20876400 |
| C | 7.24885700  | 13.22248400 | -6.28980000 |
| H | 9.29915100  | 13.06549400 | -6.93746300 |
| H | 10.15965300 | 12.54635700 | -4.66242100 |
| H | 8.60082100  | 12.41601400 | -2.74412600 |
| H | 5.30486900  | 13.31769200 | -5.35741700 |
| H | 6.86588800  | 13.44591800 | -7.28150300 |
| C | 6.70310600  | 14.93133900 | -1.82589500 |
| H | 7.04489500  | 15.13192800 | -0.81030200 |
| C | 0.66732200  | 15.34541800 | 6.25582400  |
| C | -0.06765800 | 16.49639100 | 5.56669700  |
| H | 1.74295200  | 15.52699400 | 6.25625600  |
| H | 0.33271600  | 15.22411300 | 7.28367300  |
| H | 0.09840100  | 17.41629200 | 6.13776700  |
| H | 0.31054100  | 16.65661900 | 4.55377100  |
| H | -1.14653700 | 16.31022800 | 5.52815900  |
| H | 7.56860400  | 14.73928800 | -2.45635800 |
| C | 5.87630300  | 16.10429000 | -2.35531600 |
| H | 6.49749500  | 17.00636400 | -2.35969100 |
| H | 5.53668400  | 15.91721500 | -3.37984800 |
| H | 5.00793700  | 16.29337500 | -1.71884300 |
| H | 5.05903300  | 10.95070700 | -3.56362000 |
| H | -1.50108700 | 11.29577800 | 5.56491900  |
| H | 0.42455600  | 9.63809200  | 1.38196000  |
| H | 1.60496200  | 9.61461000  | -0.37055700 |
